# Supplementary material for: Free-standing Ni-microfiber-supported carbon nanotube aerogel hybrid electrodes in 3D for high-performance supercapacitors
Source: Royal Society of Chemistry journal article supplement (doi:10.1039/c2ra20271a), 2012-01-01
Supplement: c2ra20271a.pdf [file c2ra20271a.pdf]

## Electronic Supplementary Information

### **Standing-free Ni-Microfibrous-Supported Carbon Nanotube Aerogels (CNAGs)**

#### **Hybrid Electrodes in 3D for High-performance Supercapacitors**

Yuzhu Fang,<sup>a</sup> Fangting Jiang,<sup>a</sup> Hong Liu,<sup>b</sup> Xiaoming Wu,<sup>b</sup> and Yong Lu<sup>\*a</sup>

<sup>a</sup> Shanghai Key Laboratory of Green Chemistry and Chemical Processes, Department of Chemistry, East China Normal University, Shanghai 200062, P. R. China. <sup>b</sup> TANTZ Environmental Protection Technologies Ltd., 189 South Dunhe Road, Guangzhou 510300, P. R. China.

**\* To whom correspondence should be addressed**

**Fax:** (+86)21-62233424, **E-mail:** ylu@chem.ecnu.edu.cn (Y. Lu.)

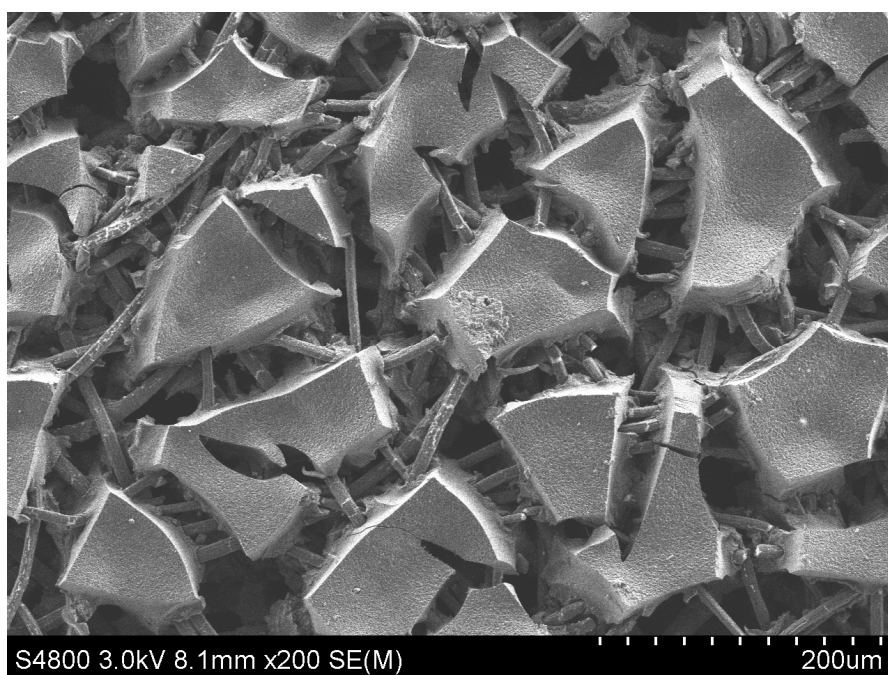

**Fig. S1** SEM image of the CAGs/SMF-Ni electrode sample.
